# Supplementary material for: MicroRNA-424/503 cluster members regulate bovine granulosa cell proliferation and cell cycle progression by targeting SMAD7 gene through activin signalling pathway
Source: PubMed Central journal article supplement (PMC5930509; doi:10.1186/s13048-018-0410-3), 2018-05-01
Supplement: 13048_2018_410_MOESM1_ESM.pdf [file 13048_2018_410_MOESM1_ESM.pdf]

**Table S1.** Sequence specific primers used for pmirGLO and 3'-UTR amplification of the SMAD7 and ACVR2A gene harboring binding site for miR-424-5p and miR-503-5p

| Accession number | Genes                 | Primer sequence                                                                                       | Size (bp) |
|------------------|-----------------------|-------------------------------------------------------------------------------------------------------|-----------|
| FJ376737         | pmirGLO               | F: 5'-GCAAGATCGCCGTGTAATTC-3'<br>R: 5'-CTTTCGGGCTTTGTTAGCAG-3'                                        | 107       |
| XM_005224232.3   | SMAD7-<br>miR/424-503 | F: 5'-GCAT <u>GAGCTC</u> AGCAGGCCACACTTCAA<br>R: 5'-ATG <b>CTCGAG</b> GGACGAGAAGAAGAAAACCAACC         | 138       |
| NM_174227        | ACVR2A-<br>miR-424    | F: 5'-GCG <u>GAGCTC</u> TTGCATTTGCTGTTGTGTTTCT-3'<br>R: 5'-TAT <b>CTCGAG</b> TAGCAACCGTGGAAGTGGAGG-3' | 201       |
| NM_174227        | ACVR2A-<br>miR-503    | F: 5'-TAG <u>GAGCTC</u> CACACACTGAGAAACAGGACTCT-3'<br>R: 5'-TAT <b>CTCGAG</b> CCTTGATTTGGAGAGGGCCA-3' | 217       |

Underlined: SacI recognition site (GAGCT|C). Bold: XhoI recognition site (C|TCGAG)

**Table S2.** Sequence specific primers used for analysis of the relative expression of genes

| <b>Accession number</b> | <b>Genes</b>   | <b>Primer sequence</b>                                           | <b>Product size (bp)</b> |
|-------------------------|----------------|------------------------------------------------------------------|--------------------------|
| NM_173979               | $\beta$ -ACTIN | F: 5'-TGTCCACCTTCCAGCAGAT-3'<br>R: 5'-TCACCTTCACCGTTCCAGT-3'     | 249                      |
| NM_001034494            | PCNA           | F: 5'-CACCAGCATGTCCAAAATAC-3'<br>R: 5'-CTGAGATCTCGGCATATACG-3'   | 192                      |
| NM_174189               | STAR           | F: 5'-AAATCCCTTTCCAAGGTCTG-3'<br>R: 5'-ACCAGCATTTCTGCTACTGC-3'   | 204                      |
| NM_001192865.1          | SMAD7          | F: 5'-GTGGCATACTGGGAGGAGAA-3'<br>R: 5'-TTGTTGTCCGAATTGAGCTG-3'   | 128                      |
| NM_174227               | ACVR2A         | F: 5'- CAGAGAAACGAGGCACCAGT-3'<br>R: 5'- GGCCATCTTTTAGGCCAGGT-3' | 186                      |
